# Supplementary material
Source: Elsevier journal article supplement (https://comptes-rendus.academie-sciences.fr/chimie/article/10.1016/j.crci.2013.01.001/file/attach/mmc1.pdf)

# checkCIF/PLATON report

No syntax errors found.    CIF dictionary    Interpreting this report

## Datablock: shelxs

---

Bond precision:    C-C = 0.0150 A                      Wavelength=0.71073

Cell:                      a=12.183(2)              b=8.8520(18)              c=19.674(4)  
                            alpha=90                      beta=103.23(3)              gamma=90

Temperature:              293 K

|                | Calculated         | Reported            |
|----------------|--------------------|---------------------|
| Volume         | 2065.4(7)          | 2065.4(7)           |
| Space group    | C 2/c              | C2/c                |
| Hall group     | -C 2yc             | ?                   |
| Moiety formula | C10 H22 N4 Ni3 O18 | ?                   |
| Sum formula    | C10 H22 N4 Ni3 O18 | C5 H11 N2 Ni1.50 O9 |
| Mr             | 662.39             | 331.22              |
| Dx,g cm-3      | 2.130              | 2.130               |
| Z              | 4                  | 8                   |
| Mu (mm-1)      | 2.809              | 2.809               |
| F000           | 1352.0             | 1352.0              |
| F000'          | 1356.82            |                     |
| h,k,lmax       | 14,10,23           | 14,10,23            |
| Nref           | 1818               | 1742                |
| Tmin,Tmax      | 0.481,0.714        | 0.467,0.729         |
| Tmin'          | 0.403              |                     |

Correction method= MULTI-SCAN

Data completeness= 0.958                      Theta(max)= 24.990

R(reflections)= 0.0937( 1081)              wR2(reflections)= 0.1544( 1742)

S = 1.100                                      Npar= 172

---

The following ALERTS were generated. Each ALERT has the format

**test-name\_ALERT\_alert-type\_alert-level.**

Click on the hyperlinks for more details of the test.

---

### Alert level B

|                   |                                      |              |                 |            |
|-------------------|--------------------------------------|--------------|-----------------|------------|
| PLAT029_ALERT_3_B | _diffrn_measured_fraction_theta_full | Low          | .....           | 0.96       |
| PLAT417_ALERT_2_B | Short Inter D-H..H-D                 | H3A          | .. H5A ..       | 2.06 Ang.  |
| PLAT417_ALERT_2_B | Short Inter D-H..H-D                 | H4A          | .. H5B ..       | 1.96 Ang.  |
| PLAT417_ALERT_2_B | Short Inter D-H..H-D                 | H6A          | .. H6A ..       | 1.97 Ang.  |
| PLAT731_ALERT_1_B | Bond Calc                            | 0.85(6), Rep | 0.848(10) ..... | 6.00 su-Ra |
|                   | 07 -H7B                              | 1.555 1.555  | #               | 33         |

---

### ● Alert level C

RINTA01\_ALERT\_3\_C The value of Rint is greater than 0.12  
Rint given 0.156  
PLAT020\_ALERT\_3\_C The value of Rint is greater than 0.12 ..... 0.16  
PLAT250\_ALERT\_2\_C Large U3/U1 Ratio for Average U(i,j) Tensor .... 2.26  
PLAT341\_ALERT\_3\_C Low Bond Precision on C-C Bonds (x 1000) Ang .. 15  
PLAT041\_ALERT\_1\_C Calc. and Reported SumFormula Strings Differ ?  
PLAT045\_ALERT\_1\_C Calculated and Reported Z Differ by ..... 0.50 Ratio  
PLAT731\_ALERT\_1\_C Bond Calc 0.85(3), Rep 0.848(10) ..... 3.00 su-Ra  
O5 -H5A 1.555 1.555 # 28  
PLAT731\_ALERT\_1\_C Bond Calc 0.85(3), Rep 0.847(10) ..... 3.00 su-Ra  
O5 -H5B 1.555 1.555 # 29  
PLAT731\_ALERT\_1\_C Bond Calc 0.85(4), Rep 0.850(10) ..... 4.00 su-Ra  
O7 -H7A 1.555 1.555 # 32

---

### ● Alert level G

PLAT083\_ALERT\_2\_G SHELXL Second Parameter in WGHT Unusually Large. 27.07  
PLAT860\_ALERT\_3\_G Note: Number of Least-Squares Restraints ..... 64  
PLAT199\_ALERT\_1\_G Check the Reported \_cell\_measurement\_temperature 293 K  
PLAT200\_ALERT\_1\_G Check the Reported \_diffrn\_ambient\_temperature 293 K  
PLAT710\_ALERT\_4\_G Delete 1-2-3 or 2-3-4 Linear Torsion Angle ... # 25  
N1 -N2 -NI2 -N2 11.00 0.00 1.555 1.555 1.555 7.657  
PLAT710\_ALERT\_4\_G Delete 1-2-3 or 2-3-4 Linear Torsion Angle ... # 26  
C4 -N2 -NI2 -N2 8.00 0.00 1.555 1.555 1.555 7.657  
PLAT710\_ALERT\_4\_G Delete 1-2-3 or 2-3-4 Linear Torsion Angle ... # 37  
C5 -O8 -NI2 -O8 11.00 0.00 1.555 1.555 1.555 7.657  
PLAT710\_ALERT\_4\_G Delete 1-2-3 or 2-3-4 Linear Torsion Angle ... # 42  
O6 -NI1 -O2 -C1 148.00 3.00 1.555 1.555 1.555 1.555  
PLAT794\_ALERT\_5\_G Note: Tentative Bond Valency for Ni2 ..... 2.12

---

0 **ALERT level A** = In general: serious problem  
5 **ALERT level B** = Potentially serious problem  
9 **ALERT level C** = Check and explain  
9 **ALERT level G** = General alerts; check

8 ALERT type 1 CIF construction/syntax error, inconsistent or missing data  
5 ALERT type 2 Indicator that the structure model may be wrong or deficient  
5 ALERT type 3 Indicator that the structure quality may be low  
4 ALERT type 4 Improvement, methodology, query or suggestion  
1 ALERT type 5 Informative message, check

---

## Publication of your CIF in IUCr journals

**A basic structural check has been run on your CIF. These basic checks will be run on all CIFs submitted for publication in IUCr journals (*Acta Crystallographica*, *Journal of Applied Crystallography*, *Journal of Synchrotron Radiation*); however, if you intend to submit to *Acta Crystallographica Section C* or *E*, you should make sure that full publication checks are run on the final version of your CIF prior to submission.**

## Publication of your CIF in other journals

**Please refer to the *Notes for Authors* of the relevant journal for any special instructions relating to CIF submission.**

PLATON version of 22/10/2010; check.def file version of 11/10/2010

Datablock shelxs - ellipsoid plot

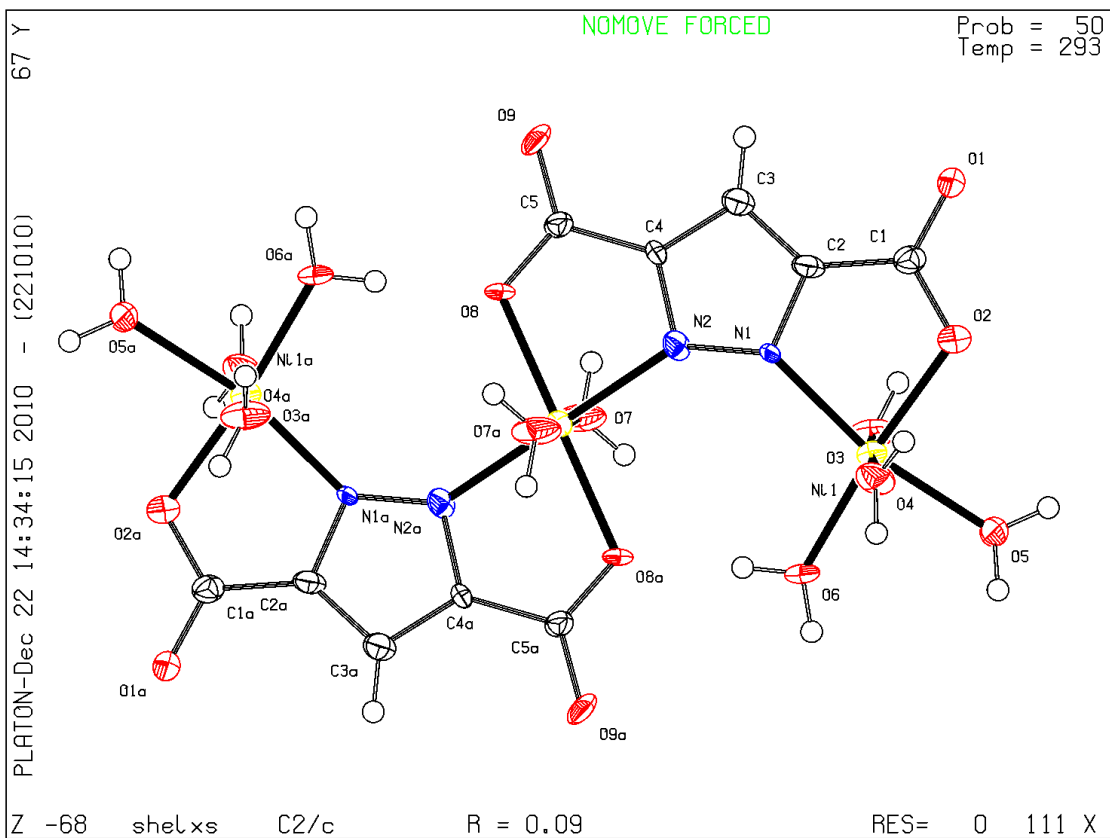

Supplement: mmc1 [file mmc1.pdf]
